# Supplementary material
Source: Springer Nature journal article supplement (https://www.springermedizin.de/resource/supplementary/12933_2009_207_MOESM3_ESM.pdf/9539842)

## All CV event types

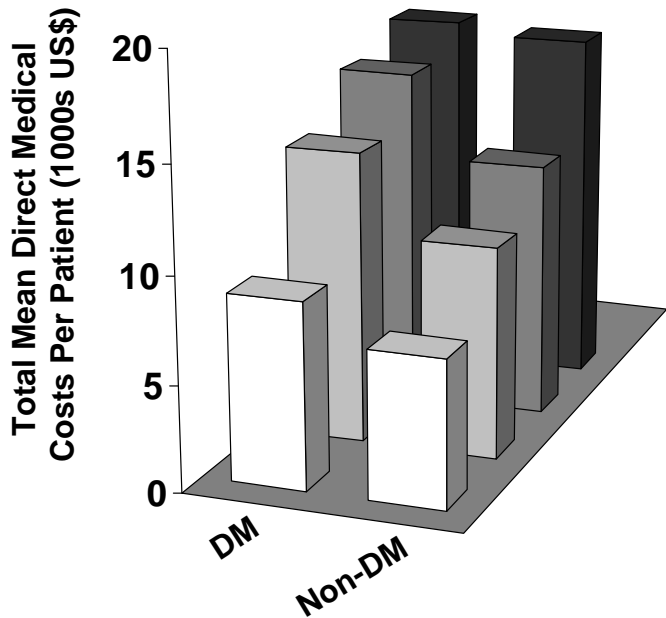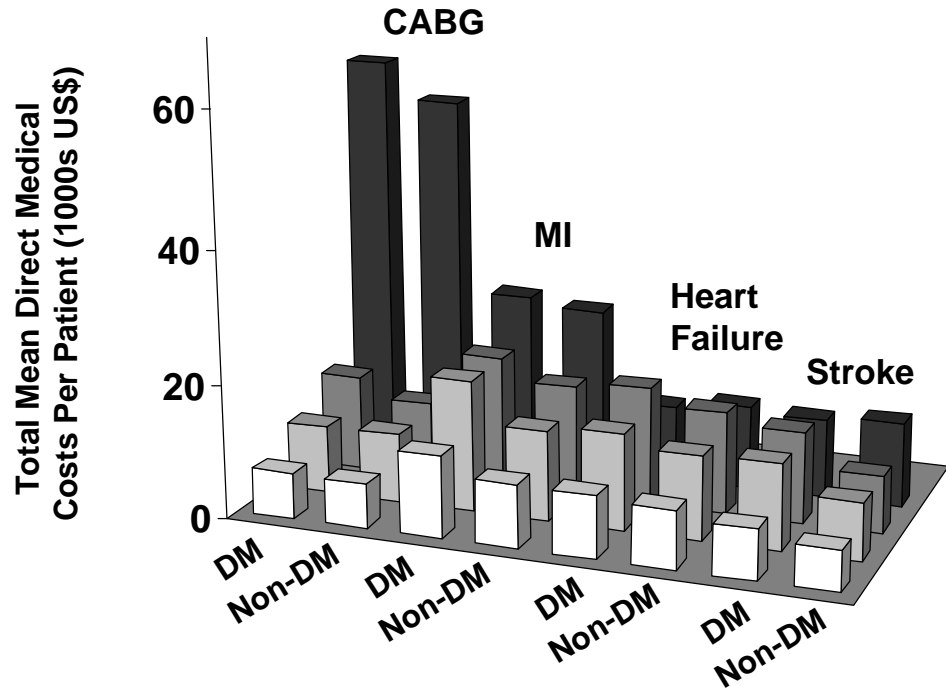

1 Year Follow-Up
  2 Years Follow-Up
  3 Years Follow-Up
  Index Hospitalization

Supplement: MOESM3 [file 9539842]
